# Supplementary material for: High-Resolution Ecological Niche Modeling of Ixodes scapularis Ticks Based on Passive Surveillance Data at the Northern Frontier of Lyme Disease Emergence in North America
Source: PubMed Central journal article supplement — Vector Borne Zoonotic Dis. 2018 May 1;18(5):235–42. doi: 10.1089/vbz.2017.2234 (PMC5930794; doi:10.1089/vbz.2017.2234), 2018-05-01
Supplement: Supp_Data.pdf [file Supp_Data.pdf]

# Supplementary Data

## Supplementary Methods

High-resolution ecological niche modeling of *Ixodes scapularis* ticks based on passive surveillance data at the northern frontier of Lyme disease emergence in North America.

## Sampling Bias

We built a MaxEnt model (with default settings) using nine potential indicators of spatial sampling bias, including variables like distance from roads and population density (Supplementary Table S2). Distance from roads was by far the most important variable in this model, as measured by permutation importance. Thus, we decided to use this variable as our proxy for likelihood of sampling.

All but one of the 63 presence points were found within 1 km of a road, whereas none were directly on a road (0 m). An exponential distribution was fit to the distribution of road distance in presence points ( $\lambda \approx 0.00721$ ). Background points ( $n = 10,000$ ) were then sampled from cells according to road distance: probability 0 from cells on roads or more than 1 km from them and with probability proportional to the fitted exponential distribution between 15–1000 m. The distribution of distances from roads of this background point dataset (Supplementary Fig. S1) much more closely reflects the fact

that the vast majority of presence points occur within 400 m of a road than the naively sampled set of background points (Supplementary Fig. S2).

## Model Selection

Beginning with the full variable set, we built models with all feature class combinations of linear, quadratic, and hinge features and regularization multiplier values between 1 and 10 in increments of 0.5. We used AICc to determine the optimal model, as described in Warren and Seifert (2011) with modifications by Wright et al. (2015) and implemented in the R package *enmSdm* (Smith 2017).

To improve the interpretability of the model, the variable set was reduced according to the method described in Yost et al. (2008). Briefly, at each step the lowest contributing variable (as measured by average loss in regularized training gain) is removed, and a 95% confidence interval of regularized training gain for the whole model is calculated (based on 10 random 75/25 training/testing partitions of the dataset). This procedure is continued until the calculated confidence interval no longer overlaps with the confidence interval of the full model with all variables, at which point removal of further variables is determined to produce an inferior model.

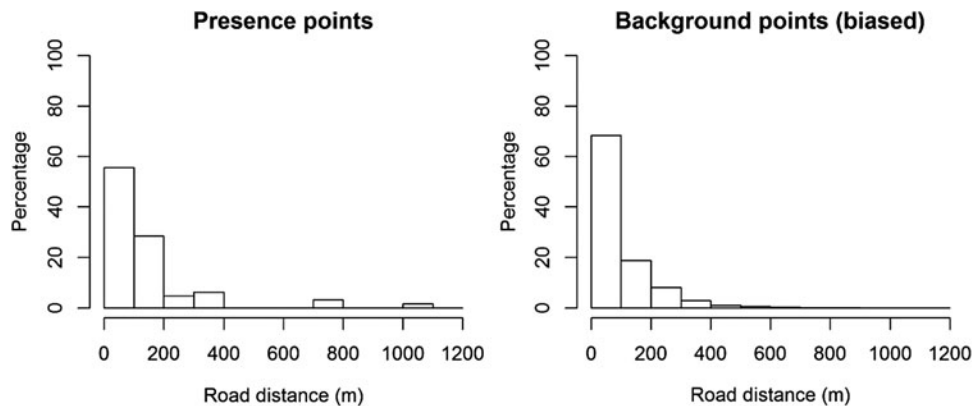

**SUPPLEMENTARY FIG. S1.** Distribution of distance from roads for presence points ( $n=63$ ) and background points sampled with spatial bias ( $n=10,000$ ).

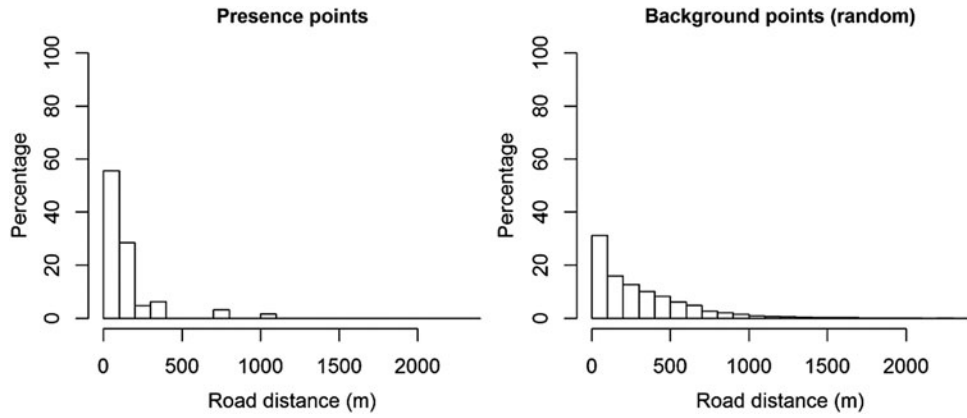

**SUPPLEMENTARY FIG. S2.** Distribution of distance from roads for presence points ( $n=63$ ) and randomly sampled background points ( $n=10,000$ ).

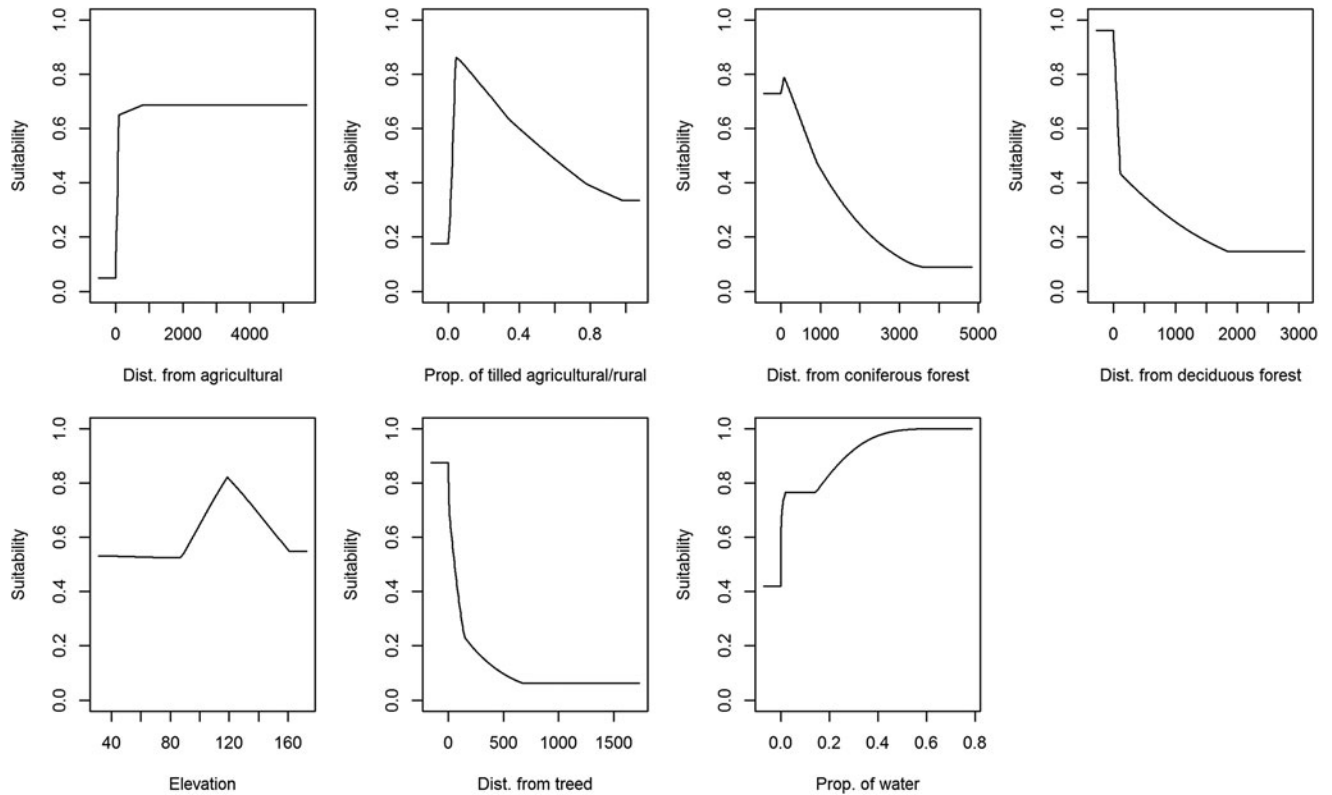

**SUPPLEMENTARY FIG. S3.** Response curves for variables in the *Ixodes scapularis* model. The  $x$ -axis shows the value of predictor, and the  $y$ -axis shows the predicted suitability. Curves obtained by varying each variable in a univariate model.

SUPPLEMENTARY TABLE S1. NAME, PROCESSING, AND ORIGINAL RESOLUTION OF ENVIRONMENTAL LAYERS TESTED IN THE *Ixodes scapularis* MODEL

| <i>Layer name</i>                                            | <i>Processing</i>                                                                                | <i>Resolution</i> |
|--------------------------------------------------------------|--------------------------------------------------------------------------------------------------|-------------------|
| Elevation                                                    | Resampled elevation raster to 15 m                                                               | 90 m              |
| Proportion of tilled agricultural                            | Calculated proportion of tiled agricultural cells within a 1000 m buffer                         | 15 m              |
| Proportion of tilled agricultural/<br>undifferentiated rural | Calculated proportion of tilled agricultural/undifferentiated rural cells within a 1000 m buffer | 15 m              |
| Proportion of coniferous forest                              | Calculated proportion of coniferous forest cells within a 1000 m buffer                          | 15 m              |
| Proportion of deciduous forest                               | Calculated proportion of deciduous forest cells within a 1000 m buffer                           | 15 m              |
| Proportion of mixed forest                                   | Calculated proportion of forest cells within a 1000 m buffer                                     | 15 m              |
| Proportion of deciduous or mixed<br>forest                   | Calculated proportion of deciduous or mixed forest cells within a 1000 m buffer                  | 15 m              |
| Proportion of forest (not including<br>hedgerows)            | Calculated proportion of forest cells within a 1000 m buffer                                     | 15 m              |
| Proportion of hedgerow                                       | Calculated proportion of hedgerow cells within a 1000 m buffer                                   | 15 m              |
| Proportion of treed (including<br>hedgerows)                 | Calculated proportion of treed cells within a 1000 m buffer                                      | 15 m              |
| Proportion of water                                          | Calculated proportion of water cells within a 1000 m buffer                                      |                   |
| Distance from tilled agricultural                            | Calculated distance from each cell to a tilled agricultural cell                                 | 15 m              |
| Distance from tilled agricultural/<br>undifferentiated rural | Calculated distance from each cell to a tilled agricultural/<br>undifferentiated rural cell      | 15 m              |
| Distance from coniferous forest                              | Calculated distance from each cell to a coniferous forest cell                                   | 15 m              |
| Distance from deciduous forest                               | Calculated distance from each cell to a deciduous forest cell                                    | 15 m              |
| Distance from mixed forest                                   | Calculated distance from each cell to a mixed forest cell                                        | 15 m              |
| Distance from deciduous or mixed<br>forest                   | Calculated distance from each cell to a deciduous or mixed<br>forest cell                        | 15 m              |
| Distance from forest (not including<br>hedgerows)            | Calculated distance from each cell to a forest cell                                              | 15 m              |
| Distance from hedgerow                                       | Calculated distance from each cell to a hedgerow cell                                            | 15 m              |
| Distance from treed (including<br>hedgerows)                 | Calculated distance from each cell to a treed cell                                               | 15 m              |
| Distance from water                                          | Calculated distance from each cell to a water cell                                               | 15 m              |

SUPPLEMENTARY TABLE S2. RECLASSIFICATION OF 21 LAND COVER CLASSES INTO 13 CLASSES IN THE SOUTHERN ONTARIO LAND RESOURCE INFORMATION SYSTEM VERSION 2.0

| <i>SOLRIS value</i> | <i>SOLRIS class</i>         | <i>New class</i>       |
|---------------------|-----------------------------|------------------------|
| 51                  | Open alvar                  | Barren/other           |
| 53                  | Treed alvar                 | Grassland/shrubland    |
| 90                  | Forest                      | Mixed forest           |
| 91                  | Coniferous forest           | Coniferous forest      |
| 92                  | Mixed forest                | Mixed forest           |
| 93                  | Deciduous forest            | Deciduous forest       |
| 131                 | Treed swamp                 | Wetland                |
| 135                 | Thicket swamp               | Wetland                |
| 140                 | Fen                         | Wetland                |
| 150                 | Bog                         | Wetland                |
| 160                 | Marsh                       | Wetland                |
| 170                 | Open water                  | Water                  |
| 191                 | Plantations—tree cultivated | Coniferous forest      |
| 192                 | Hedgerows                   | Hedgerows              |
| 193                 | Tilled                      | Tilled agricultural    |
| 201                 | Transportation              | Transportation         |
| 202                 | Built-up area—pervious      | Built-up pervious      |
| 203                 | Built-up area—impervious    | Built-up impervious    |
| 204                 | Extraction—aggregate        | Barren/other           |
| 205                 | Extraction—peat/topsoil     | Barren/other           |
| 250                 | Undifferentiated            | Rural/undifferentiated |

Only land cover classes present in Ottawa, Canada are shown.

SUPPLEMENTARY TABLE S3. NAME, PROCESSING, AND ORIGINAL RESOLUTION OF ENVIRONMENTAL LAYERS TESTED FOR SPATIALLY BIASED BACKGROUND SAMPLING IN THE *I. SCAPULARIS* MODEL

| <i>Layer name</i>                                | <i>Processing</i>                                                                                                                | <i>Resolution</i> |
|--------------------------------------------------|----------------------------------------------------------------------------------------------------------------------------------|-------------------|
| Population density                               | Rasterized population density (population/area) in Census Dissemination Areas of the Canada 2016 census (Statistics Canada 2017) | Vector            |
| Proportion of built-up area—pervious             | Calculated proportion of built-up area—pervious cells within a 1000 m buffer                                                     | 15 m              |
| Proportion of built-up area—impervious           | Calculated proportion of built-up area—impervious cells within a 1000 m buffer                                                   | 15 m              |
| Proportion of roads                              | Calculated proportion of road cells within a 1000 m buffer                                                                       | 15 m              |
| Proportion of roads and built-up area—impervious | Calculated proportion of road and built-up area—impervious cells within a 1000 m buffer                                          | 15 m              |
| Distance from built-up area—pervious             | Calculated distance from each cell to a built-up area—pervious cell                                                              | 15 m              |
| Distance from built-up area—impervious           | Calculated distance from each cell to a built-up area—impervious cell                                                            | 15 m              |
| Distance from roads                              | Calculated distance from each cell to a road cell                                                                                | 15 m              |
| Distance from roads and built-up area—impervious | Calculated distance from each cell to a road or built-up area—pervious cell                                                      | 15 m              |

### References

- Smith AB. enmSdm: Tools for modeling species niches and distributions: R package version 0.1.0.0. 2017. Available at [www.earthskysea.org](http://www.earthskysea.org)
- Statistics Canada. Canada, provinces, territories, census divisions, census subdivisions and dissemination areas. 2017. Available at [http://www12.statcan.gc.ca/census-recensement/2016/dp-pd/prof/details/download-telecharger/comp/page\\_dltc.cfm](http://www12.statcan.gc.ca/census-recensement/2016/dp-pd/prof/details/download-telecharger/comp/page_dltc.cfm)
- Warren DL, Seifert SN. Ecological niche modeling in maxent: The importance of model complexity and the performance of model selection criteria. *Ecol Appl* 2011; 21:335–342.
- Wright AN, Hijmans RJ, Schwartz MW, Shaffer HB. Multiple sources of uncertainty affect metrics for ranking conservation risk under climate change. *Divers Distrib* 2015; 21:111–122.
- Yost AC, Petersen SL, Gregg M, Miller R. Predictive modeling and mapping sage grouse (*Centrocercus urophasianus*) nesting habitat using maximum entropy and a long-term dataset from Southern Oregon. *Ecol Inform* 2008; 3:375–386.
